# Supplementary figures and images for: Radiation induces senescence and a bystander effect through metabolic alterations
Source: PubMed Central journal article supplement — Cell Death Dis. 2014 May 22;5(5):e1255–. doi: 10.1038/cddis.2014.220 (PMC4047910; doi:10.1038/cddis.2014.220), 2014-05-22

(A)

MDA-MB-231-2A

Control

6 Gy, 4 h

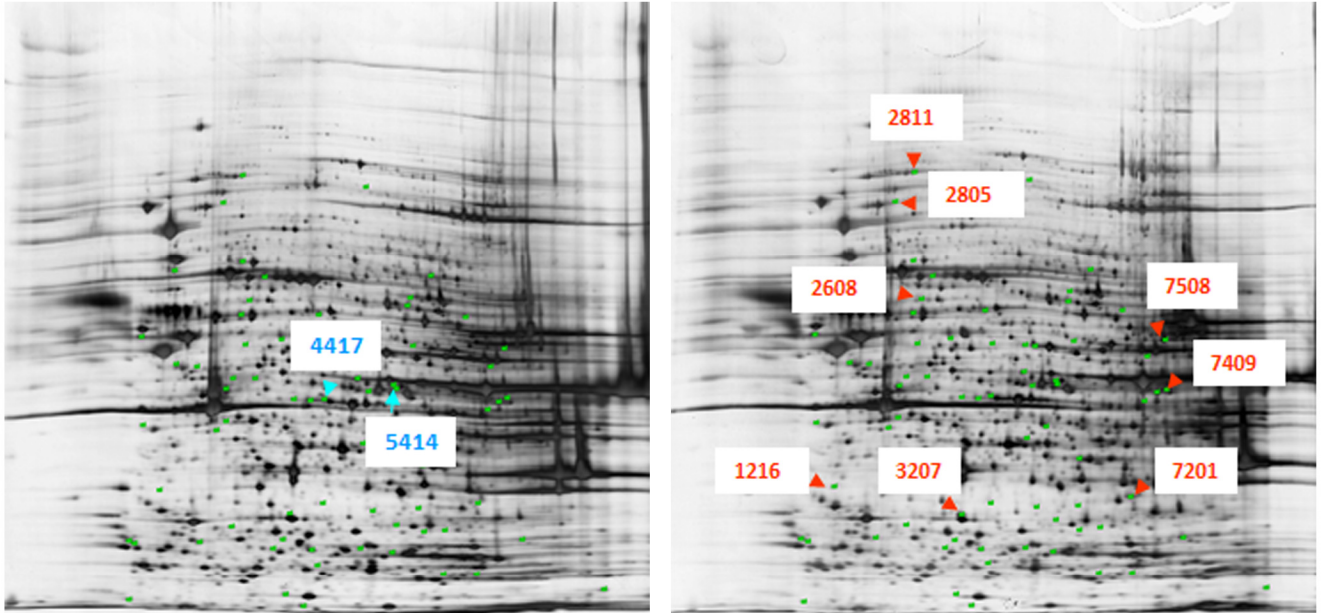

(B)

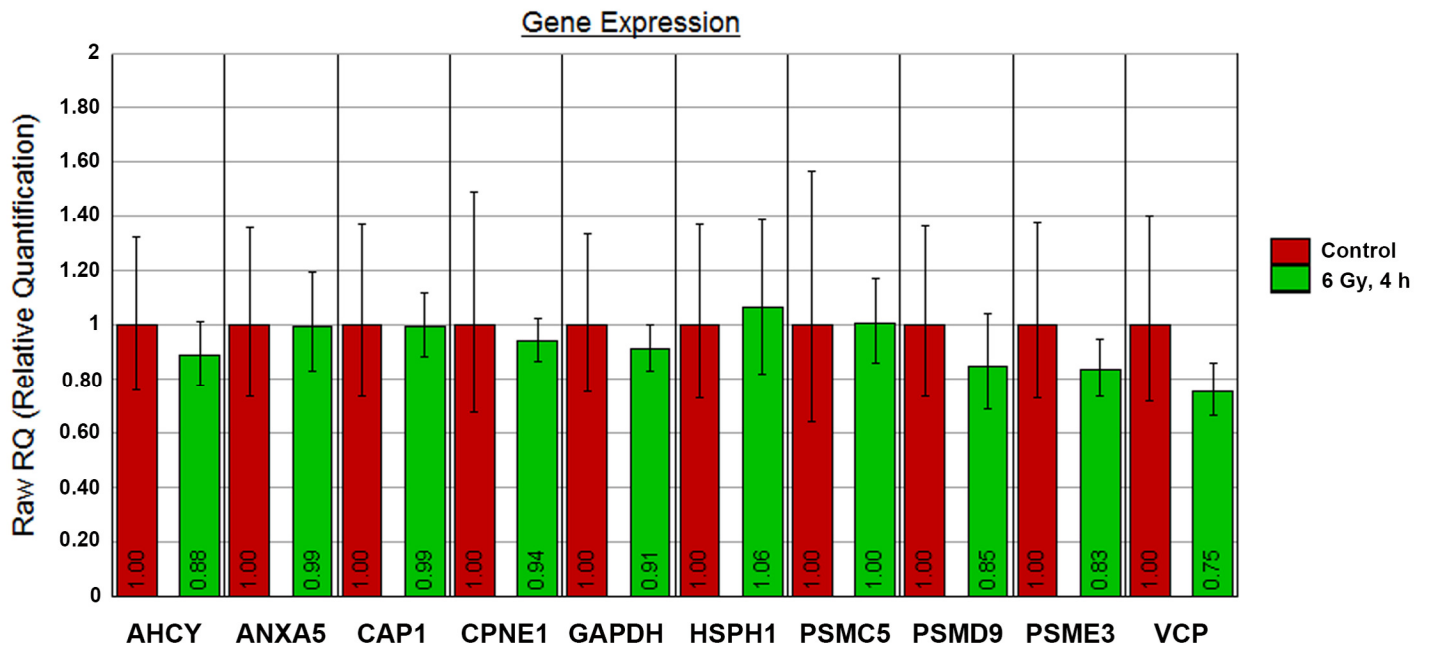

Figure S1

(A)

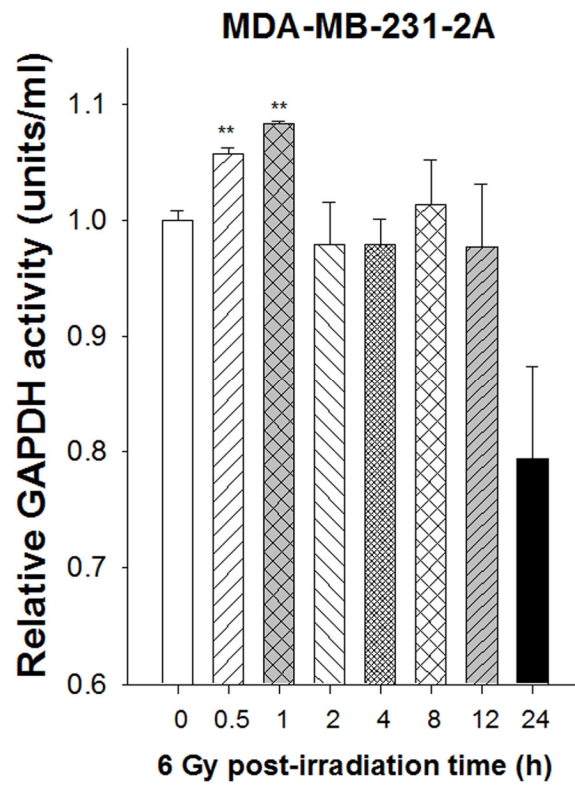

(B)

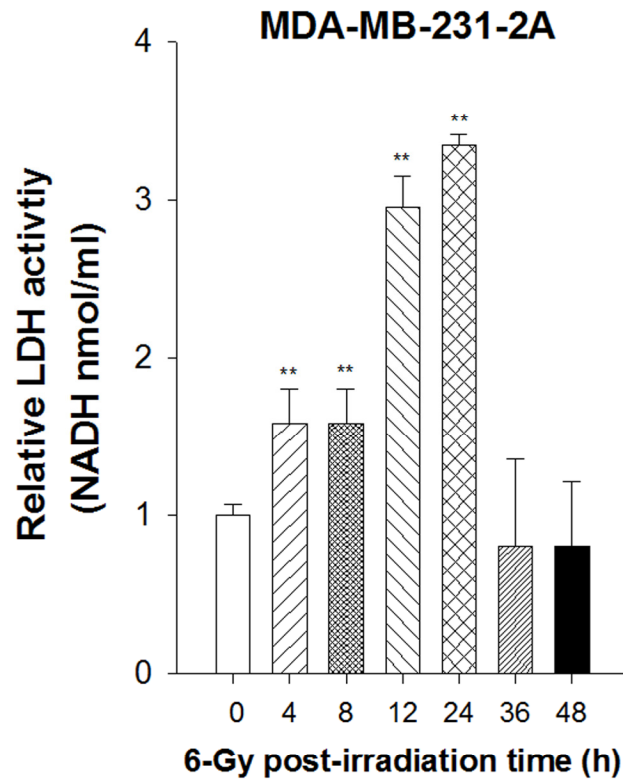

**Figure S2**

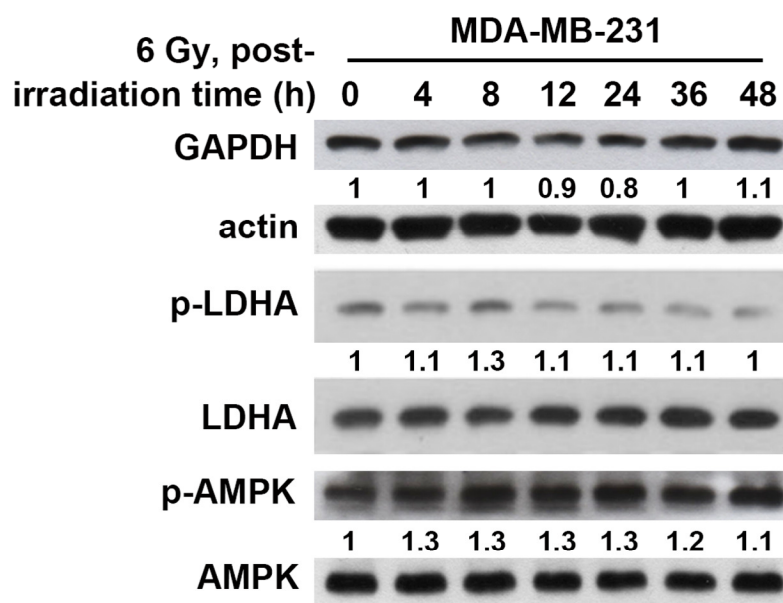

Figure S3

(A)

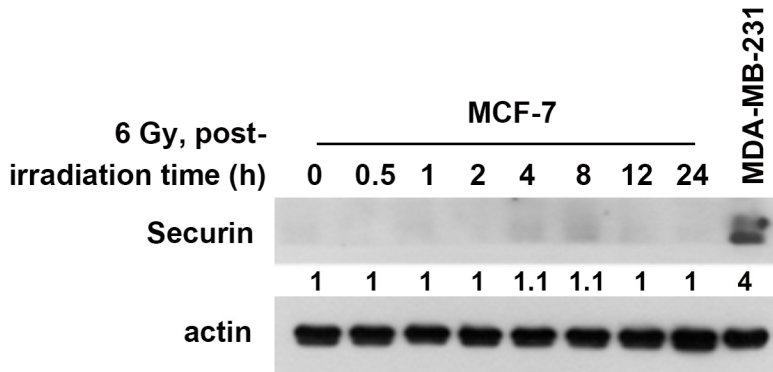

(B)

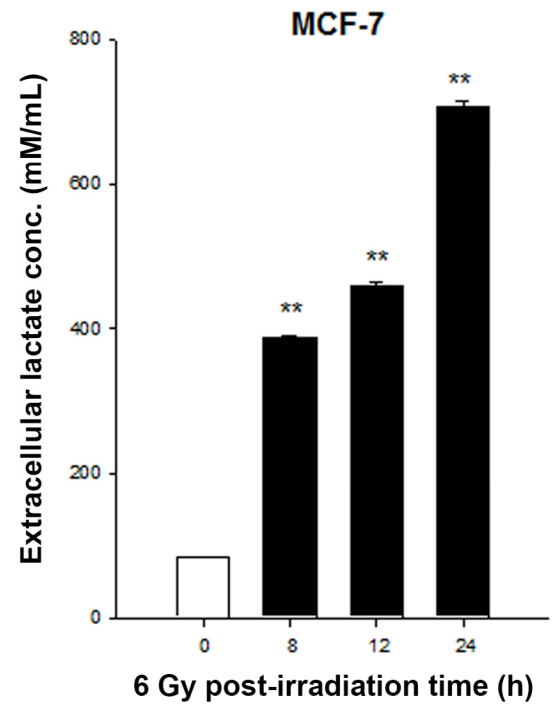

(C)

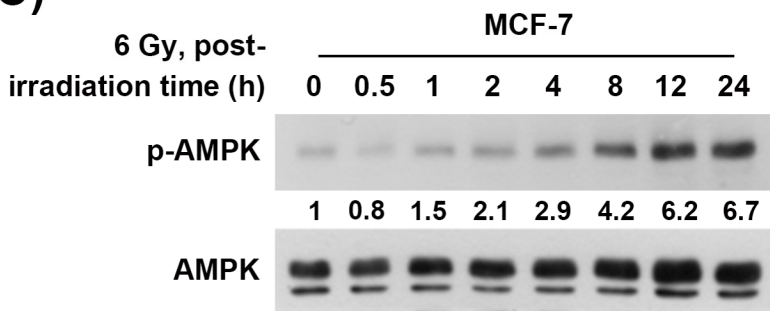

(D)

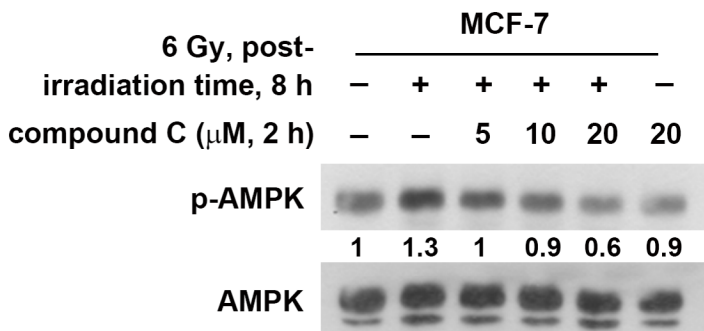

Figure S4

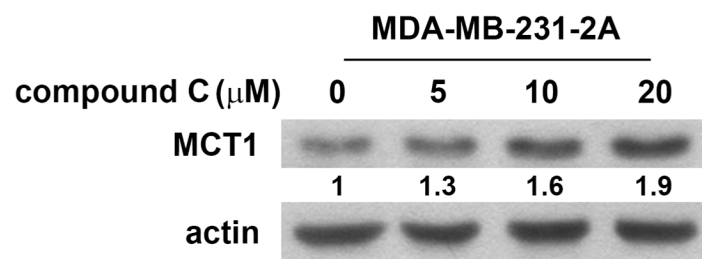

**Figure S5**

**(A)**

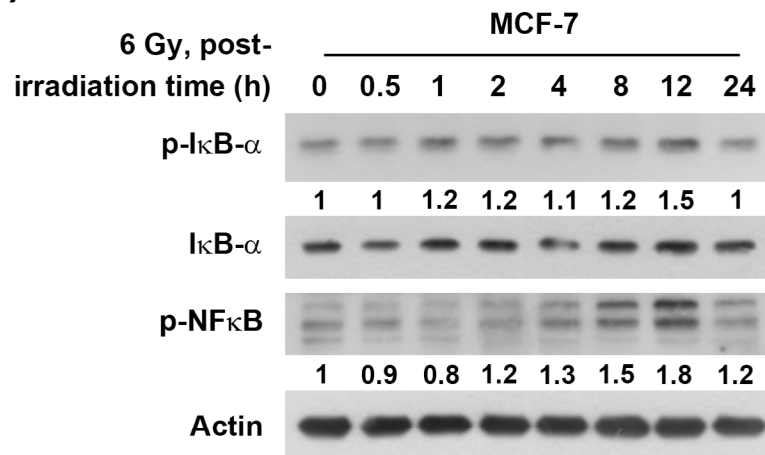

**(B)**

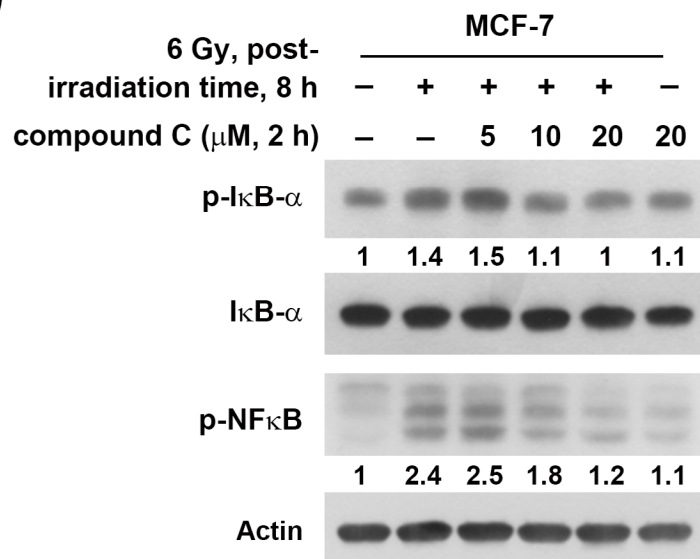

**Figure S6**

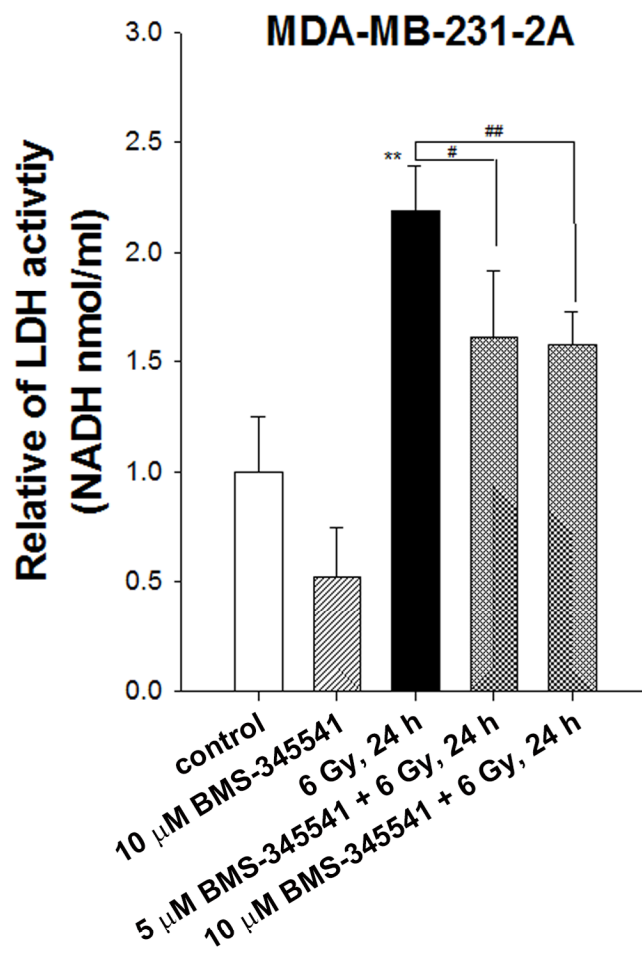

**Figure S7**

Supplement: cddis2014220x1.pdf [file cddis2014220x1.pdf]
